# Supplementary material for: Evaluating the cleavage efficacy of CRISPR-Cas9 sgRNAs targeting ineffective regions of Arabidopsis thaliana genome
Source: PeerJ. 2021 May 21;9:e11409. doi: 10.7717/peerj.11409 (PMC8142926; doi:10.7717/peerj.11409)
Supplement: Supplemental Information 1 [file peerj-09-11409-s001.xlsx]

## Sheet: Sheet1
Table S1: A detailed description of highly efficient gRNAs targeting ineffective regions of the Arabidopsis thaliana genome.
Gene ID	TS	Target Site (TS)	PAM	Target Strand	Annotation	Guide RNA (gRNA) Sequence	GC Content	gRNA Secondary Structure	MFE (kcal/mol)	sgRNA Sequence	sgRNA Secondary Structure	MFE (kcal/mol)
AT1G12280	TS1	TCTCATTACAGGATCTGTG	AGG	Reverse	3' exon	GUCUCAUUACAGGAUCUGUG	42.1	.......(((((...)))))	-1.70	GUCUCAUUACAGGAUCUGUGGUUUUAGAGCUAUGCUGAAAAGCAUAGCAAGUUAAAAUAAGGCUAGUCCGUUAUCAACUUGAAAAAGUGGCACCGAGUCGGUGCUUUUUUUU	...........((((..((.(((((((.((((((((....))))))))...)))))))...))..))))............((((((.(((((((...))))))).))))))	-33.1
AT1G17600	TS2	CGCATGTGTGATCTTGGGA	AGG	Forward	3' exon	GCGCAUGUGUGAUCUUGGGA	52.6	.(((....))).........	-1.1	GCGCAUGUGUGAUCUUGGGAGUUUUAGAGCUAUGCUGAAAAGCAUAGCAAGUUAAAAUAAGGCUAGUCCGUUAUCAACUUGAAAAAGUGGCACCGAGUCGGUGCUUUUUUUU	...((.((.((((..(((((((((((..((((((((....)))))))).........)))))))..))))..)))))).))((((((.(((((((...))))))).))))))	-33.7
AT1G17610	TS3	CGTCGTACTTCGATACACG	AGG	Forward	5' exon	GCGUCGUACUUCGAUACACG	52.6	..((((.....)))).....	-2.40	GCGUCGUACUUCGAUACACGGUUUUAGAGCUAUGCUGAAAAGCAUAGCAAGUUAAAAUAAGGCUAGUCCGUUAUCAACUUGAAAAAGUGGCACCGAGUCGGUGCUUUUUUUU	............((((.((((((((((.((((((((....))))))))...))))))..........))))))))......((((((.(((((((...))))))).))))))	-31.5
AT1G17615	TS4	TGAGTTGTCATTGGTAACG	TGG	Reverse	Intergenic	GUGAGUUGUCAUUGGUAACG	42.1	((((....))))........	-1	GUGAGUUGUCAUUGGUAACGGUUUUAGAGCUAUGCUGAAAAGCAUAGCAAGUUAAAAUAAGGCUAGUCCGUUAUCAACUUGAAAAAGUGGCACCGAGUCGGUGCUUUUUUUU	((((....))))(((((((((((((((.((((((((....))))))))...))))))..........))))))))).....((((((.(((((((...))))))).))))))	-36.8
AT1G27170	TS5	GACTTTAGATCACAGAGCA	TGG	Reverse	Intergenic	GGACUUUAGAUCACAGAGCA	42.1	....................	0	GGACUUUAGAUCACAGAGCAGUUUUAGAGCUAUGCUGAAAAGCAUAGCAAGUUAAAAUAAGGCUAGUCCGUUAUCAACUUGAAAAAGUGGCACCGAGUCGGUGCUUUUUUUU	(((((...........(((.(((((((.((((((((....))))))))...)))))))...))))))))............((((((.(((((((...))))))).))))))	-35.20
AT1G50180	TS6	GCGTCCTATGTTTCAACAA	GGG	Forward	Intron	GGCGUCCUAUGUUUCAACAA	42.1	....................	0	GGCGUCCUAUGUUUCAACAAGUUUUAGAGCUAUGCUGAAAAGCAUAGCAAGUUAAAAUAAGGCUAGUCCGUUAUCAACUUGAAAAAGUGGCACCGAGUCGGUGCUUUUUUUU	((((..(((.((((......(((((((.((((((((....))))))))...))))))).)))))))..)))).........((((((.(((((((...))))))).))))))	-30.4
AT1G63730	TS7	GAGGTGACCGTCCGTCGTG	TGG	Reverse	lncRNA	GGAGGUGACCGUCCGUCGUG	68.4	(((((...)).)))......	-3.6	GGAGGUGACCGUCCGUCGUGGUUUUAGAGCUAUGCUGAAAAGCAUAGCAAGUUAAAAUAAGGCUAGUCCGUUAUCAACUUGAAAAAGUGGCACCGAGUCGGUGCUUUUUUUU	...((((((.....(((...(((((((.((((((((....))))))))...)))))))..)))......))))))......((((((.(((((((...))))))).))))))	-35
AT1G63750	TS8	TCGCACTCTCTATAATGGC	TGG	Reverse	Intron	GUCGCACUCUCUAUAAUGGC	47.4	....................	0	GUCGCACUCUCUAUAAUGGCGUUUUAGAGCUAUGCUGAAAAGCAUAGCAAGUUAAAAUAAGGCUAGUCCGUUAUCAACUUGAAAAAGUGGCACCGAGUCGGUGCUUUUUUUU	........(((((.(((...))).)))))(((((((....)))))))((((((...((((((.....)).)))).))))))((((((.(((((((...))))))).))))))	-30.5
AT2G17050	TS9	TACGTAAGCACACGGACGG	TGG	Forward	Intergenic	GUACGUAAGCACACGGACGG	57.9	((.(((......))).))..	-2.2	GUACGUAAGCACACGGACGGGUUUUAGAGCUAUGCUGAAAAGCAUAGCAAGUUAAAAUAAGGCUAGUCCGUUAUCAACUUGAAAAAGUGGCACCGAGUCGGUGCUUUUUUUU	............((((((.(((((((..((((((((....)))))))).........))))))).))))))..........((((((.(((((((...))))))).))))))	-38
AT3G04220	TS10	TCACACATACCATGAGAAG	AGG	Forward	Intergenic	GUCACACAUACCAUGAGAAG	36.8	....................	0	GUCACACAUACCAUGAGAAGGUUUUAGAGCUAUGCUGAAAAGCAUAGCAAGUUAAAAUAAGGCUAGUCCGUUAUCAACUUGAAAAAGUGGCACCGAGUCGGUGCUUUUUUUU	.........(((.......)))......((((((((....))))))))(((((...((((((.....)).)))).))))).((((((.(((((((...))))))).))))))	-28.90
AT3G25510	TS12	GGCTTATTATAGTACTGCT	TGG	Reverse	Intergenic	GGGCUUAUUAUAGUACUGCU	36.8	..(((......)))......	-0.70	GGGCUUAUUAUAGUACUGCUGUUUUAGAGCUAUGCUGAAAAGCAUAGCAAGUUAAAAUAAGGCUAGUCCGUUAUCAACUUGAAAAAGUGGCACCGAGUCGGUGCUUUUUUUU	(((((......(((.((..((((((((.((((((((....))))))))...))))))))))))))))))............((((((.(((((((...))))))).))))))	-34.30
AT4G26090	TS13	CTTGCGATTGCGGGCAAAG	TGG	Forward	Intergenic	GCUUGCGAUUGCGGGCAAAG	57.9	((((((....))))))....	-8.4	GCUUGCGAUUGCGGGCAAAGGUUUUAGAGCUAUGCUGAAAAGCAUAGCAAGUUAAAAUAAGGCUAGUCCGUUAUCAACUUGAAAAAGUGGCACCGAGUCGGUGCUUUUUUUU	......(((.((((((...(((((((..((((((((....)))))))).........))))))).)))))).)))......((((((.(((((((...))))))).))))))	-38.90
AT5G04720	TS15	ATGGCCCATGAGGATTATA	TGG	Forward	Intergenic	GAUGGCCCAUGAGGAUUAUA	42.1	.((((.((....)).)))).	-1.2	GAUGGCCCAUGAGGAUUAUAGUUUUAGAGCUAUGCUGAAAAGCAUAGCAAGUUAAAAUAAGGCUAGUCCGUUAUCAACUUGAAAAAGUGGCACCGAGUCGGUGCUUUUUUUU	((((((......((((..((((((((..((((((((....)))))))).........))))))))))))))))))......((((((.(((((((...))))))).))))))	-36.00
AT5G17680	TS16	TCACGCGTCATTGAAAAGT	TGG	Forward	Intergenic	GUCACGCGUCAUUGAAAAGU	42.1	....................	0	GUCACGCGUCAUUGAAAAGUGUUUUAGAGCUAUGCUGAAAAGCAUAGCAAGUUAAAAUAAGGCUAGUCCGUUAUCAACUUGAAAAAGUGGCACCGAGUCGGUGCUUUUUUUU	...((((...........))))......((((((((....))))))))(((((...((((((.....)).)))).))))).((((((.(((((((...))))))).))))))	-29.8
AT5G18360	TS17	TTTGTATATCCGTGTACGT	TGG	Reverse	3' UTR	GUUUGUAUAUCCGUGUACGU	36.8	....(((((....)))))..	-1.90	GUUUGUAUAUCCGUGUACGUGUUUUAGAGCUAUGCUGAAAAGCAUAGCAAGUUAAAAUAAGGCUAGUCCGUUAUCAACUUGAAAAAGUGGCACCGAGUCGGUGCUUUUUUUU	....(((((....))))).((((((((.((((((((....))))))))...))))))))......................((((((.(((((((...))))))).))))))	-30.2
AT5G18370	TS18	AAATTATTGTCGAAGTCAG	TGG	Forward	3' UTR	GAAAUUAUUGUCGAAGUCAG	31.6	....................	0	GAAAUUAUUGUCGAAGUCAGGUUUUAGAGCUAUGCUGAAAAGCAUAGCAAGUUAAAAUAAGGCUAGUCCGUUAUCAACUUGAAAAAGUGGCACCGAGUCGGUGCUUUUUUUU	..............((((..(((((((.((((((((....))))))))...)))))))..)))).................((((((.(((((((...))))))).))))))	-31.3
AT2G17060	TS19	AGGCCAAAATCATTATCGG	TGG	Reverse	5' UTR	GAGGCCAAAAUCAUUAUCGG	42.1	....................	0	GAGGCCAAAAUCAUUAUCGGGUUUUAGAGCUAUGCUGAAAAGCAUAGCAAGUUAAAAUAAGGCUAGUCCGUUAUCAACUUGAAAAAGUGGCACCGAGUCGGUGCUUUUUUUU	..((((((((((.......))))))...((((((((....))))))))............)))).................((((((.(((((((...))))))).))))))	-31.00
AT1G72890	TS20	TCCGTTGATGTTGCGTCGG	TGG	Reverse	5' exon	GUCCGUUGAUGUUGCGUCGG	57.9	......(((((...))))).	-1.70	GUCCGUUGAUGUUGCGUCGGGUUUUAGAGCUAUGCUGAAAAGCAUAGCAAGUUAAAAUAAGGCUAGUCCGUUAUCAACUUGAAAAAGUGGCACCGAGUCGGUGCUUUUUUUU	....(((((((.((.(((..(((((((.((((((((....))))))))...)))))))..))).....)).)))))))...((((((.(((((((...))))))).))))))	-36.60
AT5G38850	TS21	TCAATCCTATAGTTTGCTC	TGG	Reverse	5' UTR	GUCAAUCCUAUAGUUUGCUC	36.8	....................	0	GUCAAUCCUAUAGUUUGCUCGUUUUAGAGCUAUGCUGAAAAGCAUAGCAAGUUAAAAUAAGGCUAGUCCGUUAUCAACUUGAAAAAGUGGCACCGAGUCGGUGCUUUUUUUU	................((((......))))((((((....)))))).((((((...((((((.....)).)))).))))))((((((.(((((((...))))))).))))))	-30.50
AT5G45250	TS22	GCTGATTAGCTGAACTGTG	TGG	Forward	Intergenic	GGCUGAUUAGCUGAACUGUG	47.4	((((....))))........	-2.5	GGCUGAUUAGCUGAACUGUGGUUUUAGAGCUAUGCUGAAAAGCAUAGCAAGUUAAAAUAAGGCUAGUCCGUUAUCAACUUGAAAAAGUGGCACCGAGUCGGUGCUUUUUUUU	(((.((((((((........(((((((.((((((((....))))))))...)))))))..)))))))).))).........((((((.(((((((...))))))).))))))	-37.9
AT5G46450	TS23	GAGGAGCCTTCTGTCAAGT	TGG	Forward	Intergenic	GGAGGAGCCUUCUGUCAAGU	52.6	((((....))))........	-2	GGAGGAGCCUUCUGUCAAGUGUUUUAGAGCUAUGCUGAAAAGCAUAGCAAGUUAAAAUAAGGCUAGUCCGUUAUCAACUUGAAAAAGUGGCACCGAGUCGGUGCUUUUUUUU	(((..(((((.........((((((((.((((((((....))))))))...)))))))))))))..)))............((((((.(((((((...))))))).))))))	-39.10
AT5G63020	TS24	CTTAAGAACACAGCTGTTA	AGG	Forward	3' UTR	GCUUAAGAACACAGCUGUUA	36.8	(((.........))).....	-0.40	GCUUAAGAACACAGCUGUUAGUUUUAGAGCUAUGCUGAAAAGCAUAGCAAGUUAAAAUAAGGCUAGUCCGUUAUCAACUUGAAAAAGUGGCACCGAGUCGGUGCUUUUUUUU	..((((((((((((((....(((((((.((((((((....))))))))...)))))))..)))).))..))).....)))))(((((.(((((((...))))))).))))).	-32
AT5G46270	TS25	TGTCGGTGGCAACATCTGT	TGG	Forward	3' UTR	GUGUCGGUGGCAACAUCUGU	52.6	.....((((....))))...	-3.3	GUGUCGGUGGCAACAUCUGUGUUUUAGAGCUAUGCUGAAAAGCAUAGCAAGUUAAAAUAAGGCUAGUCCGUUAUCAACUUGAAAAAGUGGCACCGAGUCGGUGCUUUUUUUU	..((.((((((.((.(((.((((((((.((((((((....))))))))...)))))))))))...))..)))))).))...((((((.(((((((...))))))).))))))	-34.00
AT5G66900	TS26	TCTGCATCATACGGTAAAG	AGG	Reverse	5' exon	GUCUGCAUCAUACGGUAAAG	42.1	....................	0	GUCUGCAUCAUACGGUAAAGGUUUUAGAGCUAUGCUGAAAAGCAUAGCAAGUUAAAAUAAGGCUAGUCCGUUAUCAACUUGAAAAAGUGGCACCGAGUCGGUGCUUUUUUUU	...........((((....(((((((..((((((((....)))))))).........)))))))...))))..........((((((.(((((((...))))))).))))))	-31.70
AT5G66910	TS27	CCGTCTATCGAACAACGTG	TGG	Reverse	Intergenic	GCCGUCUAUCGAACAACGUG	52.6	....................	0	GCCGUCUAUCGAACAACGUGGUUUUAGAGCUAUGCUGAAAAGCAUAGCAAGUUAAAAUAAGGCUAGUCCGUUAUCAACUUGAAAAAGUGGCACCGAGUCGGUGCUUUUUUUU	(((.((((..((((......))))))))((((((((....))))))))............)))..................((((((.(((((((...))))))).))))))	-30.9
AT5G45050, AT5G45060 CLUSTER	TS28	GTTCGGACATCCAAACCTG	TGG	Reverse	3' UTR	GGUUCGGACAUCCAAACCUG	52.6	((((.((....)).))))..	-5.6	GGUUCGGACAUCCAAACCUGGUUUUAGAGCUAUGCUGAAAAGCAUAGCAAGUUAAAAUAAGGCUAGUCCGUUAUCAACUUGAAAAAGUGGCACCGAGUCGGUGCUUUUUUUU	(((.(((((.......(((.(((((((.((((((((....))))))))...))))))).)))...)))))..)))......((((((.(((((((...))))))).))))))	-38.3
AT5G43470	TS29	AGTAGGTTTCAGTTCAGAT	TGG	Reverse	Intron	GAGUAGGUUUCAGUUCAGAU	36.8	....................	0	GAGUAGGUUUCAGUUCAGAUGUUUUAGAGCUAUGCUGAAAAGCAUAGCAAGUUAAAAUAAGGCUAGUCCGUUAUCAACUUGAAAAAGUGGCACCGAGUCGGUGCUUUUUUUU	((.(((.((..........((((((((.((((((((....))))))))...)))))))))).))).)).............((((((.(((((((...))))))).))))))	-31.4
AT5G45260	TS30	TACTCTAACGCACACCAGTG	AGG	Reverse	5' UTR	GUACUCUAACGCACACCAGUG	50	.........(((......)))	-0.5	GUACUCUAACGCACACCAGUGGUUUUAGAGCUAUGCUGAAAAGCAUAGCAAGUUAAAAUAAGGCUAGUCCGUUAUCAACUUGAAAAAGUGGCACCGAGUCGGUGCUUUUUUUU	...((((((..(((....)))...))))))(((((((....)))))))((((((...((((((.....)).)))).))))))((((((.(((((((...))))))).))))))	-34.7
AT5G46470	TS31	TCAAGCTTTCACTTGTGATG	TGG	Forward	5' UTR	GUCAAGCUUUCACUUGUGAUG	40	..((((......)))).....	-1.5	GUCAAGCUUUCACUUGUGAUGGUUUUAGAGCUAUGCUGAAAAGCAUAGCAAGUUAAAAUAAGGCUAGUCCGUUAUCAACUUGAAAAAGUGGCACCGAGUCGGUGCUUUUUUUU	.(((((.......(((((((((((((((.((((((((....))))))))...))))))..........)))))).))))))))(((((.(((((((...))))))).))))).	-32.1
AT4G08450	TS32	AATATCGTAGATCGACTGTC	GGG	Reverse	lncRNA	GAAUAUCGUAGAUCGACUGUC	40	.....(((.....))).....	-0.8	GAAUAUCGUAGAUCGACUGUCGUUUUAGAGCUAUGCUGAAAAGCAUAGCAAGUUAAAAUAAGGCUAGUCCGUUAUCAACUUGAAAAAGUGGCACCGAGUCGGUGCUUUUUUUU	..........(((.((((((((((((((.((((((((....))))))))...)))))))..))).)))).))).........((((((.(((((((...))))))).))))))	-34.2
AT1G53350	TS33	GCTGAGGCAGTTGTATCATT	TGG	Forward	5' exon	GGCUGAGGCAGUUGUAUCAUU	45	(((((...)))))........	-2.00	GGCUGAGGCAGUUGUAUCAUUGUUUUAGAGCUAUGCUGAAAAGCAUAGCAAGUUAAAAUAAGGCUAGUCCGUUAUCAACUUGAAAAAGUGGCACCGAGUCGGUGCUUUUUUUU	..((((((((((......)))))))))).((((((((....))))))))(((((...((((((.....)).)))).))))).((((((.(((((((...))))))).))))))	-36.00
AT5G45210	TS34	TTGAAAGCTAAGTGGAGGCC	GGG	Forward	Intergenic	GUUGAAAGCUAAGUGGAGGCC	50	.......(((.......))).	-1.00	GUUGAAAGCUAAGUGGAGGCCGUUUUAGAGCUAUGCUGAAAAGCAUAGCAAGUUAAAAUAAGGCUAGUCCGUUAUCAACUUGAAAAAGUGGCACCGAGUCGGUGCUUUUUUUU	(((((.(((.....((((((((((((((.((((((((....))))))))...)))))))..))))..)))))).)))))...((((((.(((((((...))))))).))))))	-40.40
AT1G12280	TS1_1	AGCACAAATGGAGTTGCCA	TGG	Reverse	Intergenic	GAGCACAAAUGGAGUUGCCA	47.4	.........(((.....)))	-0.80	GAGCACAAAUGGAGUUGCCAGUUUUAGAGCUAUGCUGAAAAGCAUAGCAAGUUAAAAUAAGGCUAGUCCGUUAUCAACUUGAAAAAGUGGCACCGAGUCGGUGCUUUUUUUU	.......((((((...(((.(((((((.((((((((....))))))))...)))))))..)))...)))))).........((((((.(((((((...))))))).))))))	-39.5
AT1G17615	TS4_1	AAGCCTAACGGTTTACCCT	AGG	Reverse	3' UTR	GAAGCCUAACGGUUUACCCU	47.4	.(((((....))))).....	-3.70	GAAGCCUAACGGUUUACCCUGUUUUAGAGCUAUGCUGAAAAGCAUAGCAAGUUAAAAUAAGGCUAGUCCGUUAUCAACUUGAAAAAGUGGCACCGAGUCGGUGCUUUUUUUU	......((((((.(((((.((((((((.((((((((....))))))))...)))))))).)).))).))))))........((((((.(((((((...))))))).))))))	-39.3
AT1G27170	TS5_1	AAGAGTCATGTCCGTTGTT	TGG	Forward	Intergenic	GAAGAGUCAUGUCCGUUGUU	42.1	....................	0	GAAGAGUCAUGUCCGUUGUUGUUUUAGAGCUAUGCUGAAAAGCAUAGCAAGUUAAAAUAAGGCUAGUCCGUUAUCAACUUGAAAAAGUGGCACCGAGUCGGUGCUUUUUUUU	((..((((..........(((((((((.((((((((....))))))))...)))))))))))))..)).............((((((.(((((((...))))))).))))))	-31.5
AT1G50180	TS6_1	CATGTGACGACTCTTGTGT	AGG	Reverse	Intergenic	GCAUGUGACGACUCUUGUGU	47.4	((((..((....))..))))	-1.3	GCAUGUGACGACUCUUGUGUGUUUUAGAGCUAUGCUGAAAAGCAUAGCAAGUUAAAAUAAGGCUAGUCCGUUAUCAACUUGAAAAAGUGGCACCGAGUCGGUGCUUUUUUUU	....(((((((((...((.((((((((.((((((((....))))))))...))))))))..)).))).)))))).......((((((.(((((((...))))))).))))))	-36.10
AT1G63730	TS7_1	TCTGATAAACTGGACAGTG	GGG	Forward	3' exon	GUCUGAUAAACUGGACAGUG	42.1	(((((......)))))....	-3.2	GUCUGAUAAACUGGACAGUGGUUUUAGAGCUAUGCUGAAAAGCAUAGCAAGUUAAAAUAAGGCUAGUCCGUUAUCAACUUGAAAAAGUGGCACCGAGUCGGUGCUUUUUUUU	...((((((..((((((((.(((((((.((((((((....))))))))...)))))))...))).))))))))))).....((((((.(((((((...))))))).))))))	-40.00
AT2G17050	TS9_1	ATTGACAGACATGAACTAG	TGG	Forward	Intergenic	GAUUGACAGACAUGAACUAG	36.8	....................	0	GAUUGACAGACAUGAACUAGGUUUUAGAGCUAUGCUGAAAAGCAUAGCAAGUUAAAAUAAGGCUAGUCCGUUAUCAACUUGAAAAAGUGGCACCGAGUCGGUGCUUUUUUUU	(((.(((.(((.((..((..(((((((.((((((((....))))))))...))))))).))..))))).))))))......((((((.(((((((...))))))).))))))	-35.4
AT3G04220	TS10_1	TCCCACTAACATAATGTCT	AGG	Reverse	Intergenic	GUCCCACUAACAUAAUGUCU	36.8	....................	0	GUCCCACUAACAUAAUGUCUGUUUUAGAGCUAUGCUGAAAAGCAUAGCAAGUUAAAAUAAGGCUAGUCCGUUAUCAACUUGAAAAAGUGGCACCGAGUCGGUGCUUUUUUUU	.......((((.....(((((((((((.((((((((....))))))))...))))))).))))......))))........((((((.(((((((...))))))).))))))	-32.40
AT3G14460	TS11_1	GTCGAACCGAGAGATTGGC	AGG	Reverse	3' exon	GGUCGAACCGAGAGAUUGGC	57.9	.......((((....)))).	-2.70	GGUCGAACCGAGAGAUUGGCGUUUUAGAGCUAUGCUGAAAAGCAUAGCAAGUUAAAAUAAGGCUAGUCCGUUAUCAACUUGAAAAAGUGGCACCGAGUCGGUGCUUUUUUUU	(((...)))((..((((((((((((((.((((((((....))))))))...)))))))...)))))))..)).........((((((.(((((((...))))))).))))))	-36.9
AT3G25510	TS12_1	TGGTGGAGCCCTACATGAA	AGG	Reverse	Intergenic	GUGGUGGAGCCCUACAUGAA	52.6	...((((....)))).....	-2.6	GUGGUGGAGCCCUACAUGAAGUUUUAGAGCUAUGCUGAAAAGCAUAGCAAGUUAAAAUAAGGCUAGUCCGUUAUCAACUUGAAAAAGUGGCACCGAGUCGGUGCUUUUUUUU	..((...((((.........(((((((.((((((((....))))))))...)))))))..))))...))............((((((.(((((((...))))))).))))))	-33
AT4G26090	TS13_1	GTACAGGTGACGTCAGCCG	CGG	Reverse	3' exon	GGUACAGGUGACGUCAGCCG	63.2	......(((.......))).	-2.1	GGUACAGGUGACGUCAGCCGGUUUUAGAGCUAUGCUGAAAAGCAUAGCAAGUUAAAAUAAGGCUAGUCCGUUAUCAACUUGAAAAAGUGGCACCGAGUCGGUGCUUUUUUUU	......(((((((..((((.(((((((.((((((((....))))))))...)))))))..))))....)))))))......((((((.(((((((...))))))).))))))	-41.30
AT4G33300	TS14_1	GAGCTCCATTGACTTGACT	TGG	Reverse	5' UTR	GGAGCUCCAUUGACUUGACU	47.4	((....))............	-0.9	GGAGCUCCAUUGACUUGACUGUUUUAGAGCUAUGCUGAAAAGCAUAGCAAGUUAAAAUAAGGCUAGUCCGUUAUCAACUUGAAAAAGUGGCACCGAGUCGGUGCUUUUUUUU	((....))...((((...(((((((((.((((((((....))))))))...))))))).))...)))).............((((((.(((((((...))))))).))))))	-33.6
AT5G04720	TS15_1	GAAAGCCGTGGTCGTCTAG	AGG	Reverse	3' UTR	GGAAAGCCGUGGUCGUCUAG	57.9	((....))............	-0.7	GGAAAGCCGUGGUCGUCUAGGUUUUAGAGCUAUGCUGAAAAGCAUAGCAAGUUAAAAUAAGGCUAGUCCGUUAUCAACUUGAAAAAGUGGCACCGAGUCGGUGCUUUUUUUU	(((.((((............(((((((.((((((((....))))))))...)))))))..))))..)))............((((((.(((((((...))))))).))))))	-34.7
AT5G18370	TS18_1	AACAGCACACAGCTAGATT	AGG	Forward	3'UTR	GAACAGCACACAGCUAGAUU	42.1	....(((.....))).....	-1.6	GAACAGCACACAGCUAGAUUGUUUUAGAGCUAUGCUGAAAAGCAUAGCAAGUUAAAAUAAGGCUAGUCCGUUAUCAACUUGAAAAAGUGGCACCGAGUCGGUGCUUUUUUUU	............(((((.(((((((((.((((((((....))))))))...)))))))))..)))))..............((((((.(((((((...))))))).))))))	-35.2
AT2G17060	TS19_1	ATCATATGGCAAGCTCATG	TGG	Forward	Intergenic	GAUCAUAUGGCAAGCUCAUG	42.1	....................	0	GAUCAUAUGGCAAGCUCAUGGUUUUAGAGCUAUGCUGAAAAGCAUAGCAAGUUAAAAUAAGGCUAGUCCGUUAUCAACUUGAAAAAGUGGCACCGAGUCGGUGCUUUUUUUU	(((.((..(((.((((....(((((((.((((((((....))))))))...)))))))..)))).))).)).)))......((((((.(((((((...))))))).))))))	-35.30
AT1G72890	TS20_1	TGGATGTGCCACTTGTGTA	TGG	Forward	3' exon	GUGGAUGUGCCACUUGUGUA	47.4	((((.....)))).......	-4.4	GUGGAUGUGCCACUUGUGUAGUUUUAGAGCUAUGCUGAAAAGCAUAGCAAGUUAAAAUAAGGCUAGUCCGUUAUCAACUUGAAAAAGUGGCACCGAGUCGGUGCUUUUUUUU	..((((..(((((....)).(((((((.((((((((....))))))))...)))))))..)))..))))............((((((.(((((((...))))))).))))))	-36.80
AT5G38850	TS21_1	CCCATATTGTGAGAAGCAT	CGG	Forward	3' UTR	GCCCAUAUUGUGAGAAGCAU	42.1	........(((.....))).	-0.1	GCCCAUAUUGUGAGAAGCAUGUUUUAGAGCUAUGCUGAAAAGCAUAGCAAGUUAAAAUAAGGCUAGUCCGUUAUCAACUUGAAAAAGUGGCACCGAGUCGGUGCUUUUUUUU	....(((.((.((..(((.((((((((.((((((((....))))))))...))))))))..)))..)))).))).......((((((.(((((((...))))))).))))))	-35.20
AT5G45250	TS22_1	ACTCTAACGCACACCAGTG	AGG	Reverse	5' UTR	GACUCUAACGCACACCAGUG	52.6	........(((......)))	-0.5	GACUCUAACGCACACCAGUGGUUUUAGAGCUAUGCUGAAAAGCAUAGCAAGUUAAAAUAAGGCUAGUCCGUUAUCAACUUGAAAAAGUGGCACCGAGUCGGUGCUUUUUUUU	..((((((..(((....)))...))))))(((((((....)))))))((((((...((((((.....)).)))).))))))((((((.(((((((...))))))).))))))	-34.70
AT5G46450	TS23_1	CGGTTTAAATTGAGTATAC	AGG	Reverse	Intergenic	GCGGUUUAAAUUGAGUAUAC	31.6	....................	0	GCGGUUUAAAUUGAGUAUACGUUUUAGAGCUAUGCUGAAAAGCAUAGCAAGUUAAAAUAAGGCUAGUCCGUUAUCAACUUGAAAAAGUGGCACCGAGUCGGUGCUUUUUUUU	((((.....(((.(((....(((((((.((((((((....))))))))...)))))))...))))))))))..........((((((.(((((((...))))))).))))))	-31.1
AT5G63020	TS24_1	TAGCGACGACTTTAGAGTT	TGG	Reverse	5' UTR	GUAGCGACGACUUUAGAGUU	42.1	....................	0	GUAGCGACGACUUUAGAGUUGUUUUAGAGCUAUGCUGAAAAGCAUAGCAAGUUAAAAUAAGGCUAGUCCGUUAUCAACUUGAAAAAGUGGCACCGAGUCGGUGCUUUUUUUU	((((((..((((..((..(((((((((.((((((((....))))))))...)))))))))..)))))))))))).......((((((.(((((((...))))))).))))))	-38.6
AT5G66910	TS27_1	ACTTCCACATGTCGGAATT	GGG	Forward	Intergenic	GACUUCCACAUGUCGGAAUU	42.1	(((........)))......	-2.9	GACUUCCACAUGUCGGAAUUGUUUUAGAGCUAUGCUGAAAAGCAUAGCAAGUUAAAAUAAGGCUAGUCCGUUAUCAACUUGAAAAAGUGGCACCGAGUCGGUGCUUUUUUUU	(((........)))((..(((((((((.((((((((....))))))))...)))))))))..)).................((((((.(((((((...))))))).))))))	-34.7
AT5G45050, AT5G45060 CLUSTER	TS28_1	GAAGTGGTGGGCACAGATC	TGG	Reverse	5' exon	GGAAGUGGUGGGCACAGAUC	57.9	....(((.....))).....	-2.30	GGAAGUGGUGGGCACAGAUCGUUUUAGAGCUAUGCUGAAAAGCAUAGCAAGUUAAAAUAAGGCUAGUCCGUUAUCAACUUGAAAAAGUGGCACCGAGUCGGUGCUUUUUUUU	..(((((((((((..((...(((((((.((((((((....))))))))...)))))))....)).))))...))).)))).((((((.(((((((...))))))).))))))	-34.2
AT5G43470	TS29_1	CCTCACTCAGAAGCAAATT	TGG	Reverse	Intergenic	GCCUCACUCAGAAGCAAAUU	42.1	((.((.....)).)).....	-2.1	GCCUCACUCAGAAGCAAAUUGUUUUAGAGCUAUGCUGAAAAGCAUAGCAAGUUAAAAUAAGGCUAGUCCGUUAUCAACUUGAAAAAGUGGCACCGAGUCGGUGCUUUUUUUU	......(((.((((((...)))))).)))(((((((....)))))))((((((...((((((.....)).)))).))))))((((((.(((((((...))))))).))))))	-32.10
AT5G45260	TS30_1	AGCTTACATACCCATTTGGC	AGG	Reverse	5' UTR	GAGCUUACAUACCCAUUUGGC	45	.....................	0	GAGCUUACAUACCCAUUUGGCGUUUUAGAGCUAUGCUGAAAAGCAUAGCAAGUUAAAAUAAGGCUAGUCCGUUAUCAACUUGAAAAAGUGGCACCGAGUCGGUGCUUUUUUUU	................((((((((((((.((((((((....))))))))...)))))))...)))))...............((((((.(((((((...))))))).))))))	-30.5
AT5G46470	TS31_1	TATTGCCGCGATGAATTCTG	TGG	Forward	Intergenic	GUAUUGCCGCGAUGAAUUCUG	45	.....................	0	GUAUUGCCGCGAUGAAUUCUGGUUUUAGAGCUAUGCUGAAAAGCAUAGCAAGUUAAAAUAAGGCUAGUCCGUUAUCAACUUGAAAAAGUGGCACCGAGUCGGUGCUUUUUUUU	..........(((((...(((((((((..((((((((....)))))))).........)))))))))....)))))......((((((.(((((((...))))))).))))))	-35
AT1G53350	TS33_1	CAAGTTTCACCTGCAACTAG	TGG	Forward	Stop codon+3' UTR	GCAAGUUUCACCUGCAACUAG	45	(((.((...)).)))......	-2.3	GCAAGUUUCACCUGCAACUAGGUUUUAGAGCUAUGCUGAAAAGCAUAGCAAGUUAAAAUAAGGCUAGUCCGUUAUCAACUUGAAAAAGUGGCACCGAGUCGGUGCUUUUUUUU	.((((((......((.((((((((((((.((((((((....))))))))...)))))))....)))))..))....))))))((((((.(((((((...))))))).))))))	-35.1
AT5G45210	TS34_1	TTCTTTAGCCGATCCGTGTG	TGG	Reverse	3' exon	GUUCUUUAGCCGAUCCGUGUG	50	.....................	0	GUUCUUUAGCCGAUCCGUGUGGUUUUAGAGCUAUGCUGAAAAGCAUAGCAAGUUAAAAUAAGGCUAGUCCGUUAUCAACUUGAAAAAGUGGCACCGAGUCGGUGCUUUUUUUU	(((((..(((((.......)))))..)))))((((((....)))))).((((((...((((((.....)).)))).))))))((((((.(((((((...))))))).))))))	-34.30
