# Supplementary material for: Evaluating the cleavage efficacy of CRISPR-Cas9 sgRNAs targeting ineffective regions of Arabidopsis thaliana genome
Source: PeerJ journal article supplement (doi:10.7717/peerj.11409), 2021-05-21

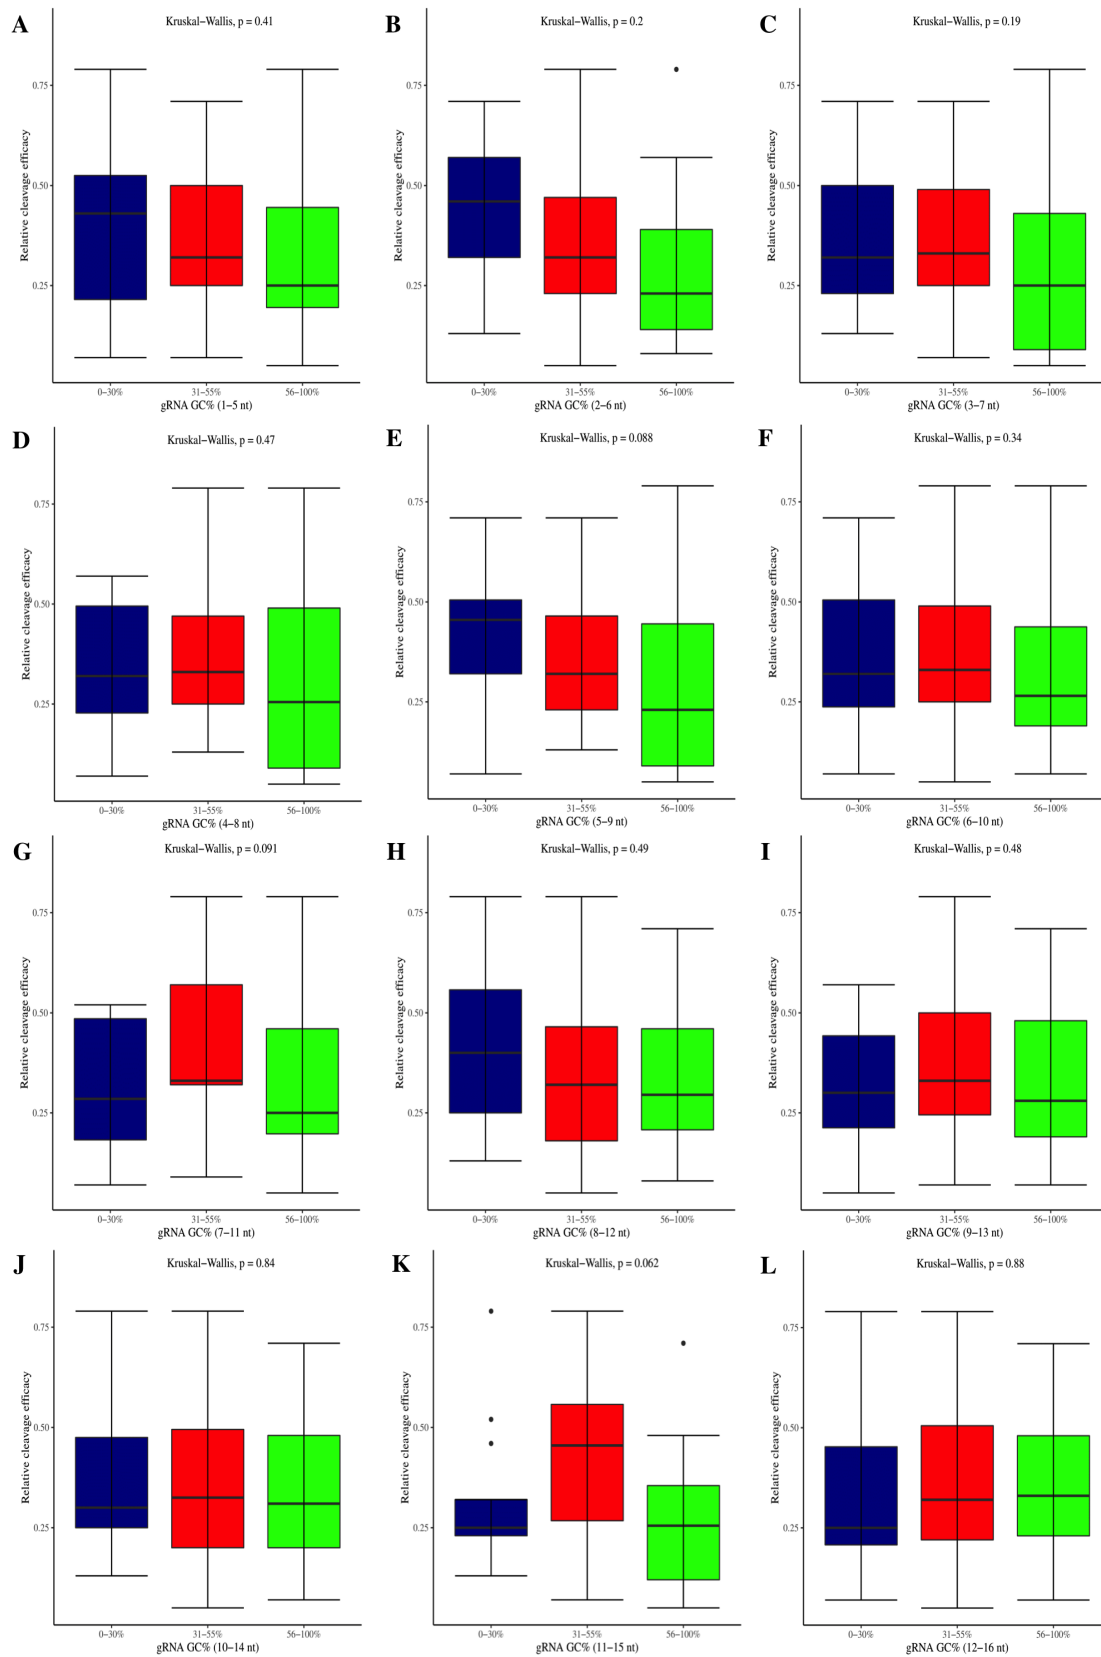

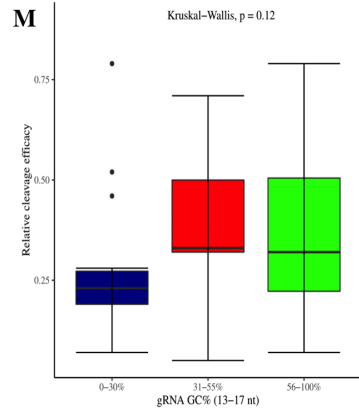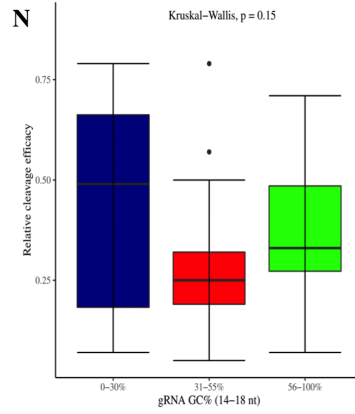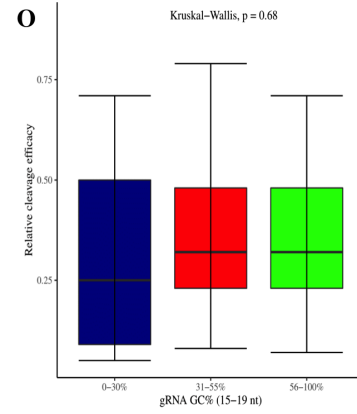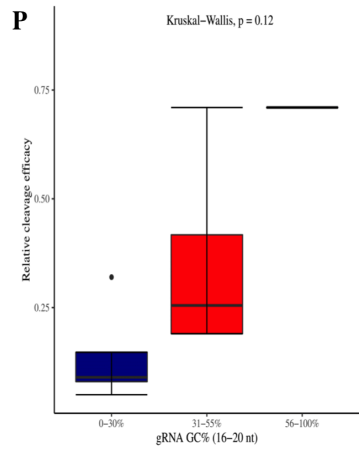

Supplement: Supplemental_Figure_S1.pdf [file Supplemental_Figure_S1.pdf]
